# Supplementary material for: Intermittent Hypoxia Exposure Helps to Restore the Reduced Hemoglobin Concentration During Intense Exercise Training in Trained Swimmers
Source: Front Physiol. 2021 Nov 29;12:736108. doi: 10.3389/fphys.2021.736108 (PMC8667786; doi:10.3389/fphys.2021.736108)
Supplement: Supplementary file 1 [file Table_1.xlsx]

## Sheet: RBC
	Baseline	Week 0	Week 1	Week 2	Week 3	Week 4
Subject 1	5.47	4.87	5.26	5.24	5.28	5.21
Subject 2	5.2	4.61	4.8	5.08	5.08	5.1
Subject 3	5.27	4.74	5.2	5.04	5.07	5.1
Subject 4	6.69	5.75	6.49	6.44	6.5	6.66
Subject 5	4.75	4.41	4.68	4.82	4.99	4.98
Subject 6	5.41	5.11	4.93	5.02	4.97	5.21

## Sheet: Hb
	Baseline	Week 0	Week 1	Week 2	Week 3	Week 4
Subject 1	15.9	14.6	16	15.6	15.9	15.5
Subject 2	15.8	14	14.5	15.3	14.9	14.9
Subject 3	16.5	14.6	15.5	15.4	15.7	15.8
Subject 4	14.5	12.3	13.5	13.9	13.9	14.2
Subject 5	15.5	13.5	14.7	15.2	15.6	15
Subject 6	15.7	14.3	14.3	14.6	15.6	15.1

## Sheet: HCT
	Baseline	Week 0	Week 1	Week 2	Week 3	Week 4
Subject 1	42.6	38.6	42.3	39.7	40.2	41.2
Subject 2	41.8	37.7	38	40.3	41	41.1
Subject 3	43.3	38.7	42	41.2	41.8	42.7
Subject 4	41.8	35.3	40.5	39.5	40.3	41.5
Subject 5	39.9	35.5	38.4	39.7	41.9	41.9
Subject 6	42.6	39.4	38.4	39.3	39.6	40.1

## Sheet: EPO
	Week 0	Week 1	Week 2	Week 3	Week 4
Subject 1	2.719	2.455	2.6	2.8	3.014
Subject 2	1.912	2.721	2.899	2.566	2.56
Subject 3	2.37	2.24	3.152	2.368	3.236
Subject 4	1.891	1.955	3.298	2.035	2.341
Subject 5	2.7	3.011	3.393	3.309	3.2
Subject 6	2.544	3.9	3.142	3.819	2.859

## Sheet: Testosterone (T)
	Week 0	Week 1	Week 2	Week 3	Week 4
Subject 1	9.49	9.95	12	13	15.66
Subject 2	7.98	8.31	13.11	9.62	10
Subject 3	8.64	9.36	9.39	9.3	8.52
Subject 4	7.79	8.49	8.91	8.25	10.76
Subject 5	7.13	7.99	8.79	9.92	9.5
Subject 6	5.4	9.06	8.64	12.97	15.52

## Sheet: Cortisol(C)
	Week 0	Week 1	Week 2	Week 3	Week 4
Subject 1	170.16	161.44	150	150	146.01
Subject 2	121.42	132.39	126.45	128.26	125
Subject 3	177.51	169.31	146.19	174.98	135.69
Subject 4	145.41	165.64	161.55	158.46	143.77
Subject 5	138.07	140.91	126.12	124.74	130
Subject 6	105.05	90.24	135.76	127.05	109.94

## Sheet: T divided by C
	Week 0	Week 1	Week 2	Week 3	Week 4
Subject 1	0.056	0.062	0.08	0.087	0.107
Subject 2	0.066	0.063	0.104	0.075	0.08
Subject 3	0.049	0.055	0.064	0.053	0.063
Subject 4	0.054	0.051	0.055	0.052	0.075
Subject 5	0.052	0.057	0.07	0.079	0.073
Subject 6	0.051	0.1	0.064	0.102	0.141

## Sheet: MCV
	Week 0	Week 1	Week 2	Week 3	Week 4
Subject 1	72.28	82.69	79.81	81.31	83.03
Subject 2	68.68	70.83	69.98	70.62	70.74
Subject 3	87.4	82.34	86.51	85.26	86.51
Subject 4	69.52	68.35	69.9	70.38	67.39
Subject 5	82.69	85.76	85.99	88.83	84.75
Subject 6	81.28	72.6	70.98	72.4	74.46

## Sheet: RDW
	Week 0	Week 1	Week 2	Week 3	Week 4
Subject 1	13.55	13.19	13.74	13.05	13.48
Subject 2	13.34	12.78	12.53	13.04	13.03
Subject 3	11.98	11.92	11.77	11.63	11.6
Subject 4	13.57	13.61	13.44	13.35	13.13
Subject 5	12.13	13.12	13.25	13.56	12.93
Subject 6	12.08	12.03	12.39	12.26	12.54

## Sheet: CHCM
	Week 0	Week 1	Week 2	Week 3	Week 4
Subject 1	36.71	36.1	37.43	38.28	37.62
Subject 2	39.3	40.26	39.16	39.68	39.56
Subject 3	38.92	37.29	37.62	36.92	37.06
Subject 4	39.93	39.99	40.53	39.11	39.77
Subject 5	37.39	39.08	38.75	38.69	38.54
Subject 6	36.32	35.13	36.76	35.83	36.09

[truncated: 5 more sheets: HDW, CH, MCH, Retic#, Retic%]
